# Supplementary material for: Peptide-Protein Interaction Studies of Antimicrobial Peptides Targeting Middle East Respiratory Syndrome Coronavirus Spike Protein: An In Silico Approach
Source: Adv Bioinformatics. 2019 Jul 1;2019:6815105. doi: 10.1155/2019/6815105 (PMC6634063; doi:10.1155/2019/6815105)
Supplement: Supplementary Materials — Supplementary Table 1 shows the model evaluation of modelled AMPs using Rampage Server. [file 6815105.f1.pdf]

Table 1: Validation of modelled AMPs using Rampage servers

| Peptide        | Rampage server                                                        |
|----------------|-----------------------------------------------------------------------|
| (1)<br>AP00074 | Number of residues in favoured region (~98.0% expected) : 20 ( 90.9%) |
|                | Number of residues in allowed region (~2.0% expected) : 1 ( 4.5%)     |
|                | Number of residues in outlier region : 1 ( 4.5%)                      |
| (2)<br>AP00166 | Number of residues in favoured region (~98.0% expected) : 23 (100.0%) |
|                | Number of residues in allowed region (~2.0% expected) : 0 ( 0.0%)     |
|                | Number of residues in outlier region : 0 ( 0.0%)                      |
| (3)<br>AP00275 | Number of residues in favoured region (~98.0% expected) : 23 ( 79.3%) |
|                | Number of residues in allowed region (~2.0% expected) : 4 ( 13.8%)    |
|                | Number of residues in outlier region : 2 ( 6.9%)                      |
| (4)<br>AP00181 | Number of residues in favoured region (~98.0% expected) : 25 ( 83.3%) |
|                | Number of residues in allowed region (~2.0% expected) : 4 ( 13.3%)    |
|                | Number of residues in outlier region : 1 ( 3.3%)                      |
| (5)<br>AP00340 | Number of residues in favoured region (~98.0% expected) : 23 (100.0%) |
|                | Number of residues in allowed region (~2.0% expected) : 0 ( 0.0%)     |
|                | Number of residues in outlier region : 0 ( 0.0%)                      |
| (6)<br>AP00549 | Number of residues in favoured region (~98.0% expected) : 31 ( 81.6%) |
|                | Number of residues in allowed region (~2.0% expected) : 3 ( 7.9%)     |
|                | Number of residues in outlier region : 4 ( 10.5%)                     |
| (7)<br>AP00729 | Number of residues in favoured region (~98.0% expected) : 24 ( 88.9%) |
|                | Number of residues in allowed region (~2.0% expected) : 3 ( 11.1%)    |
|                | Number of residues in outlier region : 0 ( 0.0%)                      |

|                 |                                                                       |
|-----------------|-----------------------------------------------------------------------|
| (8)<br>AP00730  | Number of residues in favoured region (~98.0% expected) : 22 ( 75.9%) |
|                 | Number of residues in allowed region (~2.0% expected) : 5 ( 17.2%)    |
|                 | Number of residues in outlier region : 2 ( 6.9%)                      |
| (9)<br>AP02571  | Number of residues in favoured region (~98.0% expected) : 22 ( 75.9%) |
|                 | Number of residues in allowed region (~2.0% expected) : 5 ( 17.2%)    |
|                 | Number of residues in outlier region : 2 ( 6.9%)                      |
| (10)<br>AP02733 | Number of residues in favoured region (~98.0% expected) : 36 ( 67.9%) |
|                 | Number of residues in allowed region (~2.0% expected) : 9 ( 17.0%)    |
|                 | Number of residues in outlier region : 8 ( 15.1%)                     |
| (11)<br>AP00180 | Number of residues in favoured region (~98.0% expected) : 25 ( 83.3%) |
|                 | Number of residues in allowed region (~2.0% expected) : 3 ( 10.0%)    |
|                 | Number of residues in outlier region : 2 ( 6.7%)                      |
| (12)<br>AP00225 | Number of residues in favoured region (~98.0% expected) : 23 ( 79.3%) |
|                 | Number of residues in allowed region (~2.0% expected) : 2 ( 6.9%)     |
|                 | Number of residues in outlier region : 4 ( 13.8%)                     |
| (13)<br>AP00744 | Number of residues in favoured region (~98.0% expected) : 34 ( 87.2%) |
|                 | Number of residues in allowed region (~2.0% expected) : 3 ( 7.7%)     |
|                 | Number of residues in outlier region : 2 ( 5.1%)                      |
